# Supplementary material for: Decoding the essential interplay between central and peripheral control in adaptive locomotion of amphibious centipedes
Source: Springer Nature journal article supplement (doi:10.1038/s41598-019-53258-3), 2019-12-02
Supplement: 41598_2019_53258_MOESM1_ESM.pdf [file 41598_2019_53258_MOESM1_ESM.pdf]

## Supplementary Information

### **Decoding the essential interplay between central and peripheral control in adaptive locomotion of amphibious centipedes**

Kotaro Yasui<sup>1,2,\*</sup>, Takeshi Kano<sup>1</sup>, Emily M. Standen<sup>3</sup>, Hitoshi Aonuma<sup>4</sup>, Auke J. Ijspeert<sup>5</sup> and Akio Ishiguro<sup>1</sup>

<sup>1</sup>Research Institute of Electrical Communication, Tohoku University, 2-1-1 Katahira, Aoba-Ward, Sendai 980-8577, Japan.

<sup>2</sup>Japan Society for the Promotion of Science (JSPS), 5-3-1 Kojimachi, Chiyoda-Ward, Tokyo 102-0083, Japan.

<sup>3</sup>Department of Biology, University of Ottawa, 30 Marie Curie Private, Ottawa, Ontario K1N 6N5, Canada.

<sup>4</sup>Research Institute for Electronic Science, Hokkaido University, N12W7, Kita-Ward, Sapporo 060-0812, Japan.

<sup>5</sup>Institute of Bioengineering, École Polytechnique Fédérale de Lausanne (EPFL), Lausanne CH-1015, Switzerland.

\*Correspondence to [k.yasui@riec.tohoku.ac.jp](mailto:k.yasui@riec.tohoku.ac.jp)

**Supplementary Table S1 | Coefficients of viscous friction employed in simulations**

|          | Leg tip                     |                                | Body trunk          |         |
|----------|-----------------------------|--------------------------------|---------------------|---------|
|          | $0 \leq \phi_{i,j}^L < \pi$ | $\pi \leq \phi_{i,j}^L < 2\pi$ | tangential          | normal  |
| On land  | 0                           | $\mu_g$                        | 0                   | 0       |
| In water | $\mu_w$                     | $\mu_w$                        | $\mu_t$             | $\mu_n$ |
|          | $0 < \mu_w < \mu_g$         |                                | $0 < \mu_t < \mu_n$ |         |

**Supplementary Table S2 | Parameter values employed in simulations**

| <b>Parameter</b>                | <b>Value</b>         | <b>Dimension</b> |
|---------------------------------|----------------------|------------------|
| $\omega_L$                      | 18.0                 | $[s^{-1}]$       |
| $\omega_B$                      | 12.0                 | $[s^{-1}]$       |
| $\sigma_1$                      | 50.0                 | $[s^{-1}]$       |
| $\sigma_2$                      | 10.0                 | $[s^{-1}]$       |
| $\sigma_3$                      | 45.0                 | $[s^{-1}]$       |
| $\psi_L^{ipsi}$                 | $\pi/2.7$            |                  |
| $\psi_L^{contra}$               | $\pi$                |                  |
| $\psi_B$                        | $\pi/11$             |                  |
| $c_0$                           | $\pi/2$              |                  |
| $c_L$                           | 0.75                 |                  |
| $c_B$                           | $\pi/18$             |                  |
| $\tau_M$                        | 0.055                | $[s]$            |
| $\tau_S$                        | 0.14                 | $[s]$            |
| $c_S$                           | $1.0 \times 10^3$    |                  |
| $F_{th}$                        | $1.0 \times 10^1$    |                  |
| $\mu_g$                         | $1.4 \times 10^{-1}$ | $[kgs^{-1}]$     |
| $\mu_w$                         | $7.1 \times 10^{-5}$ | $[kgs^{-1}]$     |
| $\mu_t$                         | $7.1 \times 10^{-5}$ | $[kgs^{-1}]$     |
| $\mu_n$                         | $2.4 \times 10^{-3}$ | $[kgs^{-1}]$     |
| $k^L$                           | $6.0 \times 10^{-4}$ | $[m^2s^{-2}kg]$  |
| $d^L$                           | $1.5 \times 10^{-6}$ | $[m^2s^{-1}kg]$  |
| $k^B$                           | $2.1 \times 10^{-3}$ | $[m^2s^{-2}kg]$  |
| $d^B$                           | $3.0 \times 10^{-6}$ | $[m^2s^{-1}kg]$  |
| Spring constant of leg link     | 70.6                 | $[kgs^{-2}]$     |
| Damping coefficient of leg link | $2.4 \times 10^{-1}$ | $[kgs^{-1}]$     |

## **【Legends for Supplementary Movies】**

**Supplementary Movie S1** | Walking of the centipede *Scolopendra subspinipes mutilans*.

**Supplementary Movie S2** | Swimming of the centipede *Scolopendra subspinipes mutilans*.

**Supplementary Movie S3** | Centipede locomotion during transition from land to water.

**Supplementary Movie S4** | Centipede locomotion during transition from water to land.

**Supplementary Movie S5** | Walking of a nerve cord transected centipede.

**Supplementary Movie S6** | Swimming of a nerve cord transected centipede.

**Supplementary Movie S7** | Simulated centipede locomotion during transition from land to water.

**Supplementary Movie S8** | Simulated centipede locomotion during transition from water to land.

**Supplementary Movie S9** | Simulated locomotion of a nerve cord transected centipede.

**Supplementary Movie S10** | Locomotion of a nerve cord transected centipede during transition from water to land.

**Supplementary Movie S11** | Locomotion of a nerve cord transected centipede during transition from land to water.

**Supplementary Movie S12** | Simulated centipede locomotion during transition from water to land, driven by a control mechanism different from our proposed model. Locomotor mode of each segment is determined by Eq. (12).

**Supplementary Movie S13** | Simulated centipede walking when a part of the terrain was removed. Grey area denotes the gap appeared between the land area (white-colored).

**Supplementary Movie S14** | Simulated centipede walking when three pairs of leg in the middle segments were amputated.

**Supplementary Movie S15** | Locomotion of the centipede *Scolopendra subspinipes mutilans* on a slippery upslope surface. The movie was taken from the top. The ground made of plastic plate was inclined  $12^\circ$  with respect to the horizontal.
